# Supplementary material
Source: ML conference proceedings conference paper supplement (https://openaccess.thecvf.com/content/CVPR2025/html/Chen_Hiding_Images_in_CVPR_2025_paper.html)
Supplement: Supplementary file 1 [file Chen_Hiding_Images_in_CVPR_2025_supplemental.pdf]

## Appendix

### A1. More Visual Examples

Fig. A1 show visual examples of extracted secret images along with absolute error maps from our stego diffusion models, when hiding two and four images, respectively. Fig. A2 compares images generated by the original and stego diffusion models when hiding two and four secret images, respectively.

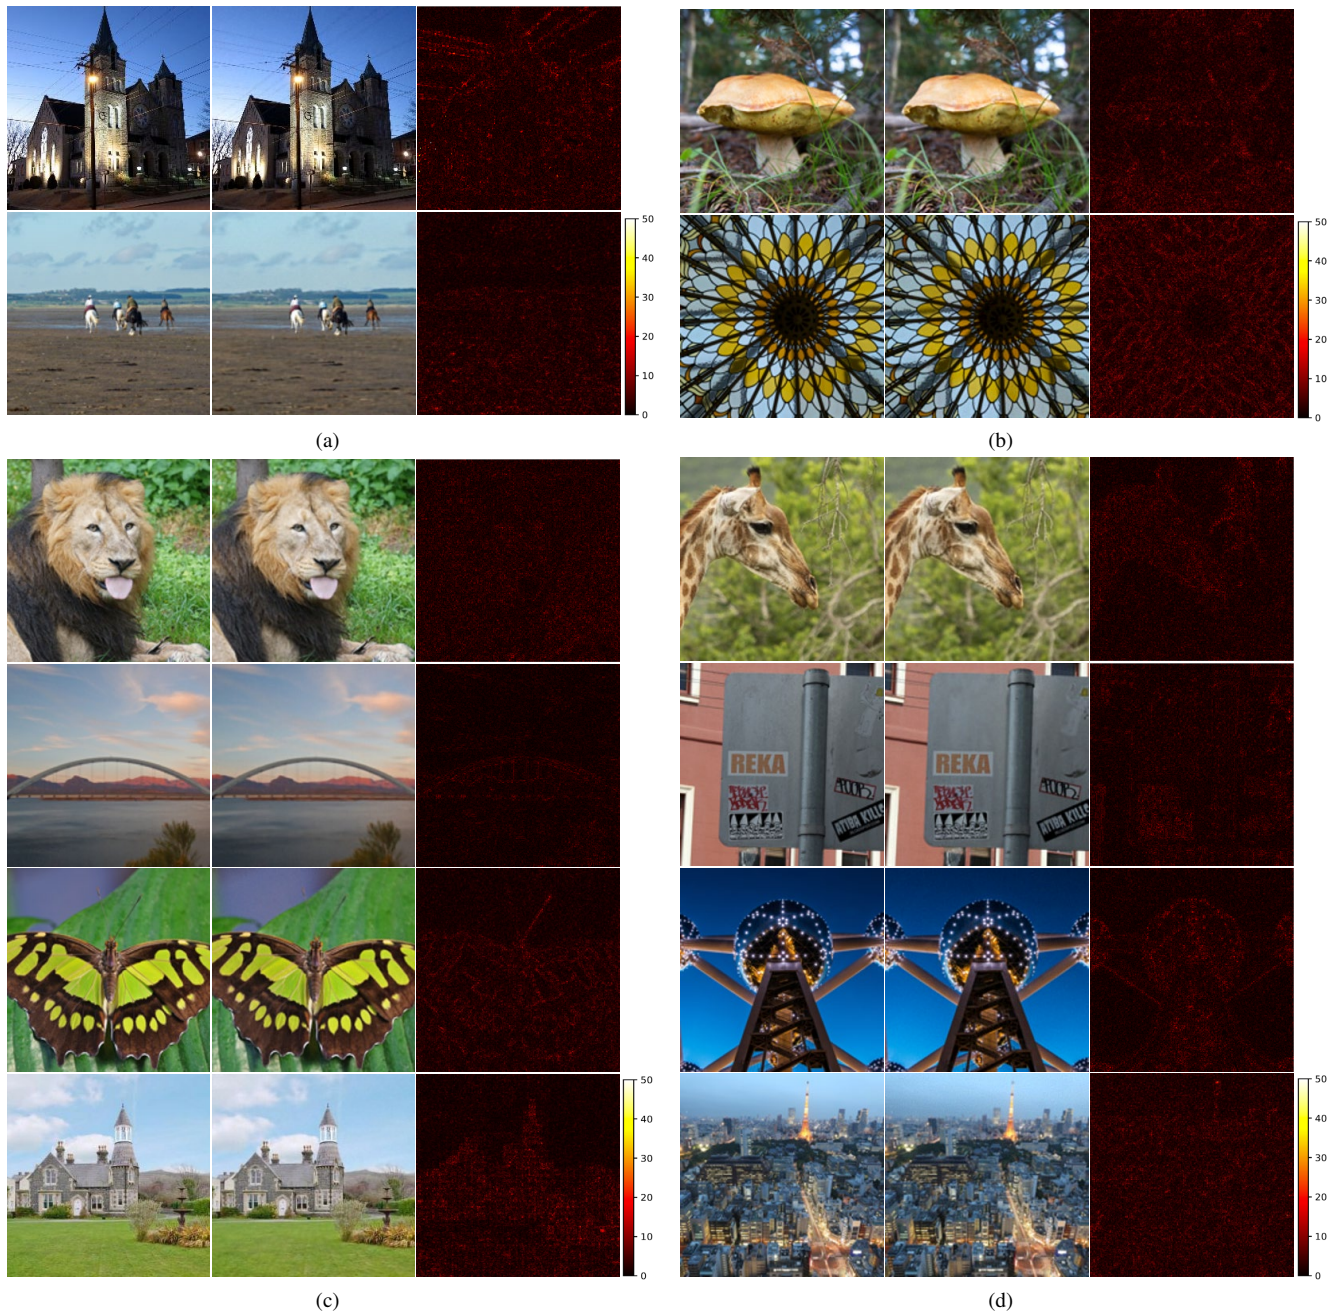

Figure A1. Visual examples of extracted secret images and corresponding absolute error maps for hiding two images (subfigures (a) and (b)) and four images (subfigures (c) and (d)). In each subfigure, columns from left to right show the ground-truth secret images, extracted secret images, and absolute error maps, respectively.



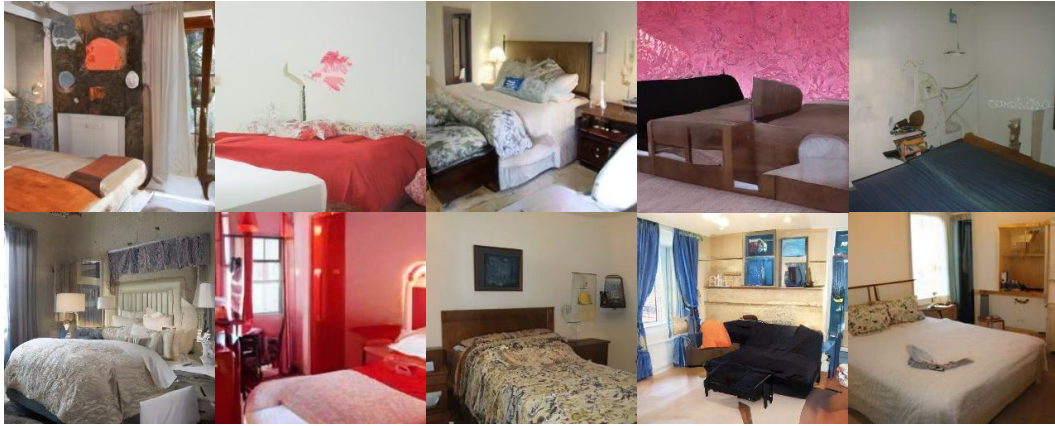

(a) Original

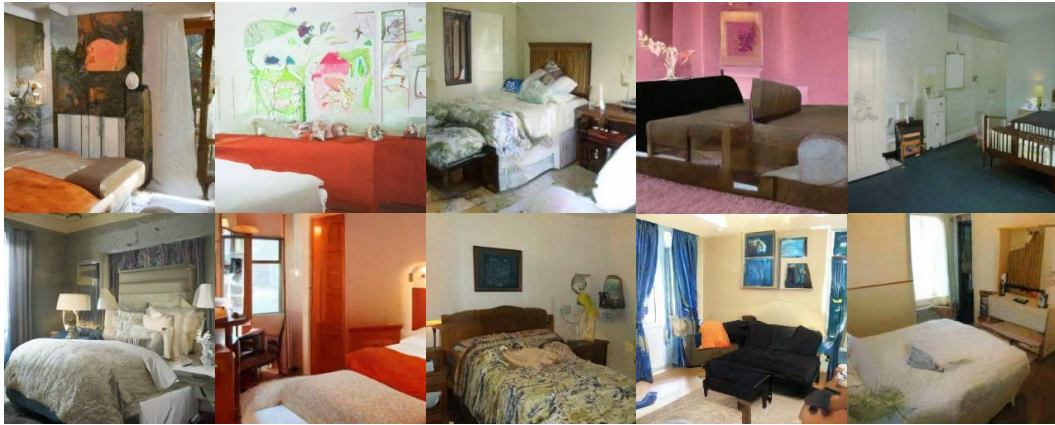

(b) Stego model for hiding two images

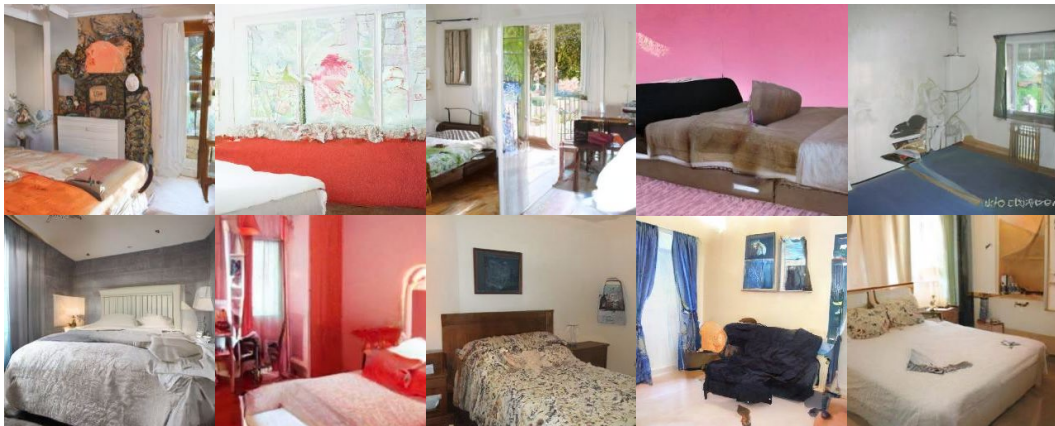

(c) Stego model for hiding four images

Figure A2. Visual comparison of images generated by the original and stego diffusion models embedding two and four secret images.
